# Supplementary material
Source: publisher figshare collection journal article supplement (https://sage.figshare.com/ndownloader/files/15264239)
Supplement: Supplementary file 1 [file 15264239]

**Appendix A. Registerable offenses in the study state (obtained from the study state’s sex offender registry FAQs webpage).**

| Statute                                                                                       | Description                                                                                                                                                                                                                                                                                                                                                                                         |
|-----------------------------------------------------------------------------------------------|-----------------------------------------------------------------------------------------------------------------------------------------------------------------------------------------------------------------------------------------------------------------------------------------------------------------------------------------------------------------------------------------------------|
| <i>Mandatory registration for those who have violated the following statutes.</i>             |                                                                                                                                                                                                                                                                                                                                                                                                     |
| 301.45                                                                                        | (1) Any sex offender required to register in another state/jurisdiction; (2) any sex offender convicted in a military, tribal, or federal court; (3) any sex offender who has been convicted in another state of an offense comparable to one of the study state’s registerable offenses; (4) any juvenile who is on supervision and enters the study state under the Interstate Compact Agreement. |
| 940.22(2)                                                                                     | Sexual Exploitation by Therapist                                                                                                                                                                                                                                                                                                                                                                    |
| 940.225(1)                                                                                    | First-Degree Sexual Assault                                                                                                                                                                                                                                                                                                                                                                         |
| 940.225(2)                                                                                    | Second-Degree Sexual Assault                                                                                                                                                                                                                                                                                                                                                                        |
| 940.225(3)                                                                                    | Third-Degree Sexual Assault                                                                                                                                                                                                                                                                                                                                                                         |
| 940.30                                                                                        | False Imprisonment (victim was minor and not the offender's child)                                                                                                                                                                                                                                                                                                                                  |
| 940.302(2)                                                                                    | Human Trafficking (if 940.302(2)(a)1b applies)                                                                                                                                                                                                                                                                                                                                                      |
| 940.31                                                                                        | Kidnapping (victim was minor and not the offender's child)                                                                                                                                                                                                                                                                                                                                          |
| 944.01                                                                                        | Rape (old statute)                                                                                                                                                                                                                                                                                                                                                                                  |
| 944.06                                                                                        | Incest                                                                                                                                                                                                                                                                                                                                                                                              |
| 944.10                                                                                        | Sexual Intercourse with a Child (old statute)                                                                                                                                                                                                                                                                                                                                                       |
| 944.11                                                                                        | Indecent Behavior with a Child (old statute)                                                                                                                                                                                                                                                                                                                                                        |
| 944.12                                                                                        | Enticing Child for Immoral Purposes (old statute)                                                                                                                                                                                                                                                                                                                                                   |
| 948.02(1)                                                                                     | First-Degree Sexual Assault of a Child                                                                                                                                                                                                                                                                                                                                                              |
| 948.02(2)                                                                                     | Second-Degree Sexual Assault of a Child                                                                                                                                                                                                                                                                                                                                                             |
| 948.025                                                                                       | Repeated Acts of Sexual Assault of a Child                                                                                                                                                                                                                                                                                                                                                          |
| 948.05                                                                                        | Sexual Exploitation of a Child                                                                                                                                                                                                                                                                                                                                                                      |
| 948.051                                                                                       | Trafficking of Child                                                                                                                                                                                                                                                                                                                                                                                |
| 948.055                                                                                       | Forced Viewing of Sexual Activity                                                                                                                                                                                                                                                                                                                                                                   |
| 948.06                                                                                        | Incest with a Child                                                                                                                                                                                                                                                                                                                                                                                 |
| 948.07(1-4)                                                                                   | Child Enticement                                                                                                                                                                                                                                                                                                                                                                                    |
| 948.075                                                                                       | Use of a Computer to Facilitate a Sex Crime                                                                                                                                                                                                                                                                                                                                                         |
| 948.08                                                                                        | Soliciting a Child for Prostitution                                                                                                                                                                                                                                                                                                                                                                 |
| 948.085                                                                                       | Sexual Assault of a Child Placed in Substitute Care                                                                                                                                                                                                                                                                                                                                                 |
| 948.095                                                                                       | Sexual Assault of a Student by School Staff                                                                                                                                                                                                                                                                                                                                                         |
| 948.11(2)(a-am)                                                                               | Exposing Child to Harmful Material-felony sections                                                                                                                                                                                                                                                                                                                                                  |
| 948.12                                                                                        | Possession of Child Pornography                                                                                                                                                                                                                                                                                                                                                                     |
| 948.13                                                                                        | Convicted Child Sex Offender Working with Children                                                                                                                                                                                                                                                                                                                                                  |
| 948.30                                                                                        | Abduction of Another's Child                                                                                                                                                                                                                                                                                                                                                                        |
| 971.17                                                                                        | Not Guilty by Reason of Mental Disease-of a listed sex offense                                                                                                                                                                                                                                                                                                                                      |
| 975.06                                                                                        | Sex Crimes Law Commitment                                                                                                                                                                                                                                                                                                                                                                           |
| 980.01                                                                                        | Sexually Violent Person Commitment                                                                                                                                                                                                                                                                                                                                                                  |
| <i>The court has discretion to require registration for violating the following statutes:</i> |                                                                                                                                                                                                                                                                                                                                                                                                     |
| Chapter 940                                                                                   | Crimes Against Life and Bodily Security                                                                                                                                                                                                                                                                                                                                                             |
| Chapter 944                                                                                   | Crimes Against Sexual Morality                                                                                                                                                                                                                                                                                                                                                                      |
| Chapter 948                                                                                   | Crimes Against Children                                                                                                                                                                                                                                                                                                                                                                             |
| 971.17                                                                                        | Not Guilty by Reason of Mental Disease or Defect                                                                                                                                                                                                                                                                                                                                                    |
| 943.01-943.15                                                                                 | Certain Crimes Against Property                                                                                                                                                                                                                                                                                                                                                                     |
| 942.08                                                                                        | Invasion of Privacy (i.e., “Peeping Tom”)                                                                                                                                                                                                                                                                                                                                                           |
| 942.09                                                                                        | Representations Depicting Nudity                                                                                                                                                                                                                                                                                                                                                                    |

**Appendix B. Descriptive Statistics and Factor Loadings for Variables in Disadvantage Factor Score.**

| Variable                           | Minimum | Maximum | $\bar{X}$ | $s^2$ | Factor Loading |
|------------------------------------|---------|---------|-----------|-------|----------------|
| % receiving SNAP/public assistance | 1.06    | 40.54   | 15.43     | 10.73 | .859           |
| % below poverty line               | 0.00    | 39.27   | 10.19     | 9.74  | .813           |
| % less than high school degree     | 1.70    | 35.55   | 11.14     | 7.18  | .804           |
| % non-white                        | 0.00    | 39.59   | 13.40     | 9.91  | .804           |
| % female-headed households         | 0.00    | 60.42   | 23.10     | 15.38 | .635           |
